# Supplementary material for: miRNA-584-3p inhibits gastric cancer progression by repressing Yin Yang 1- facilitated MMP-14 expression
Source: PubMed Central journal article supplement (PMC5566321; doi:10.1038/s41598-017-09271-5), 2017-08-21
Supplement: 41598_2017_9271_MOESM1_ESM.pdf [file 41598_2017_9271_MOESM1_ESM.pdf]

# miRNA-584-3p inhibits gastric cancer progression by repressing Yin Yang 1-facilitated MMP-14 expression

Liduan Zheng<sup>1,2,#</sup>, Yajun Chen<sup>1,#</sup>, Lin Ye<sup>3,#</sup>, Wanju Jiao<sup>1</sup>, Huajie Song<sup>3</sup>, Hong Mei<sup>3</sup>,  
Dan Li<sup>3</sup>, Feng Yang<sup>3</sup>, Huanhuan Li<sup>3</sup>, Kai Huang<sup>2</sup>, and Qiangsong Tong<sup>2,3,\*</sup>

- <sup>1</sup> Department of Pathology, Union Hospital, Tongji Medical College, Huazhong University of Science and Technology, 1277 Jiefang Avenue, Wuhan 430022, Hubei Province, P. R. China
- <sup>2</sup> Clinical Center of Human Genomic Research, Union Hospital, Tongji Medical College, Huazhong University of Science and Technology, 1277 Jiefang Avenue, Wuhan 430022, Hubei Province, P. R. China
- <sup>3</sup> Department of Surgery, Union Hospital, Tongji Medical College, Huazhong University of Science and Technology, 1277 Jiefang Avenue, Wuhan 430022, Hubei Province, P. R. China

## Supplementary Figure Legends

**Supplementary Figure S1 Effects of YY1 on MMP-14 expression.** **a**, over-lapping analysis revealing YY1 as a crucial transcription factor of *MMP-14*. **b**, the correlation between *YY1* and *MMP-14* levels in public gastric cancer datasets derived from Gene Expression Omnibus (GEO). **c**, real-time quantitative RT-PCR showing the effects of YY1 and C646 on cellular *MMP-14* expression. \*  $P < 0.01$  vs. mock.

**Supplementary Figure S2 Expression of MMP-14 and VEGF in gastric cancer cells.** Real-time quantitative RT-PCR indicating the *MMP-14* and *VEGF* levels in cancer cells with ectopic expression or knockdown of miR-584-3p (**a** and **b**), and those co-transfected with sh-Scb or sh-AGO2 (**c**). RIP and qPCR (**d**), western blot (**e**), and CHIP and qPCR (**f**) assays showing the interaction between miR-548-3p and AGO2, expression of H3K27me3 and H3K9me2, and protein

enrichment on *MMP-14* promoter in gastric cancer cells transfected with mock or miR-584-3p, and those co-transfected with sh-Scb, sh-AGO2, sh-YY1 or treated with GSK343 (1  $\mu$ mol/L) or A-366 (3  $\mu$ mol/L). \*  $P < 0.01$  vs. mock, anti-NC, mock+sh-Scb, IgG, or mock+DMSO.

**Supplementary Figure S3 Roles of YY1 and miR-584-3p in cancer cells.** Real-time quantitative RT-PCR (a), western blot (b), dual-luciferase (c), ChIP (using YY1 antibody) and qPCR (d) assays showing the expression of MMP-14 and YY1, activity of *MMP-14* promoter reporter [pGL3-MMP14 (-1246/+199)], and YY1 binding to *MMP-14* promoter in cancer cells transfected with empty vector (mock) or miR-584-3p precursor, and those co-transfected with *YY1* (mean  $\pm$  SD, n=4). \*  $P < 0.01$  vs. mock+mock.

**Supplementary Figure S4 Effects of miR-584-3p and YY1 on gastric cancer cells.** Western blot (a), MTT colorimetric (b), soft agar (c), matrigel invasion (d), and tube formation (e) assays indicating gene expression, viability, growth, invasion, and angiogenesis of cancer cells transfected with sh-Scb, sh-YY1, anti-NC, anti-miR-584-3p inhibitors (100 nmol/L). \*  $P < 0.01$  vs. sh-Scb+anti-NC.

**Supplementary Figure S5 miR-584-3p and YY1 exert functions through regulating MMP-14 expression.** Western blot (a and e), MTT colorimetric (b and f), matrigel invasion (c and g), and tube formation (d and h) assays indicating gene expression, viability, invasion, and angiogenesis of cancer cells transfected as indicated. \*  $P < 0.01$  vs. mock+mock or mock+sh-Scb.

**Supplementary Figure S6 Expression of miR-584-3p, SH3TC2, and MMP-14 in publicly available datasets.** a and b, miR-584-3p and SH3TC2 levels in gastric cancer and adjacent normal

tissues derived from Gene Expression Omnibus (GEO) datasets. **c**, the correlation between SH3TC2 and MMP-14 levels in gastric cancer tissues derived from GEO datasets.

**Supplementary Figure S7 Interaction between AGO2 with EZH2, EHMT2, and YY1 in gastric cancer cells.** Co-IP and western blot assays showing the interaction of AGO2 with EZH2, EHMT2, and YY1 in MKN-45 cells stably transfected with mock or miR-584-3p precursor.

# Supplementary Figure S1

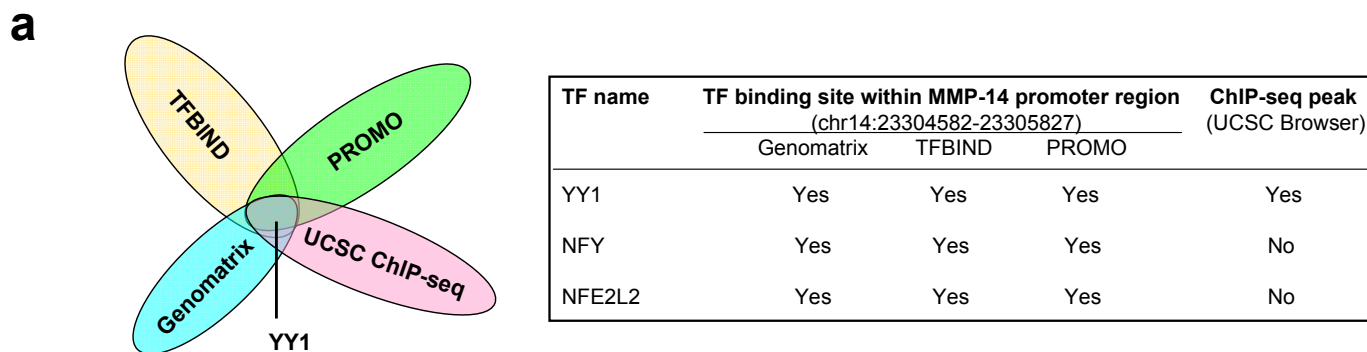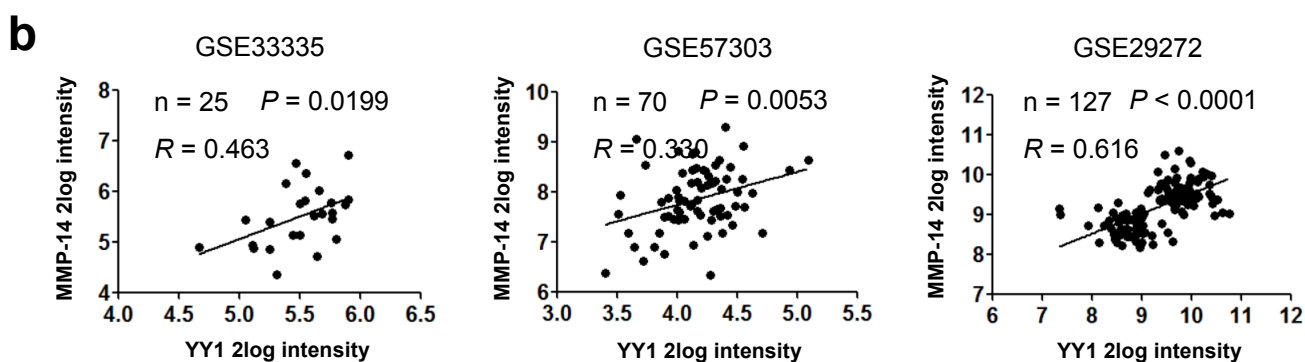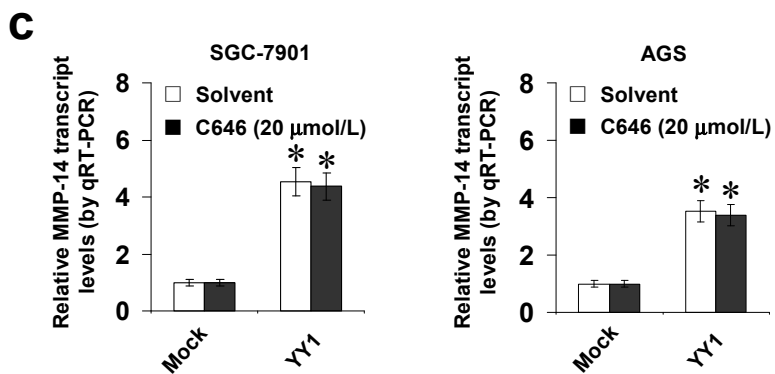

# Supplementary Figure S2

**a**

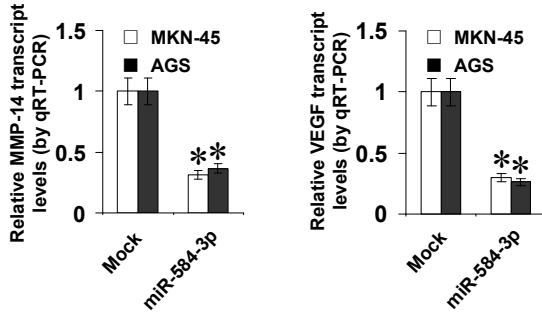

**b**

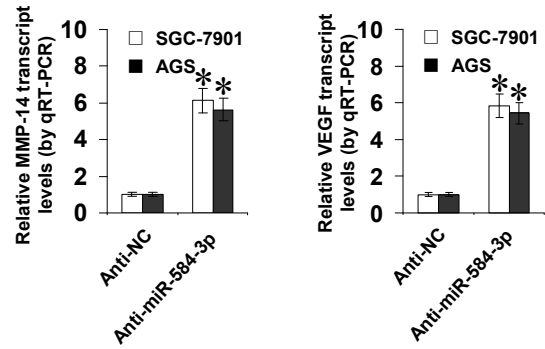

**c**

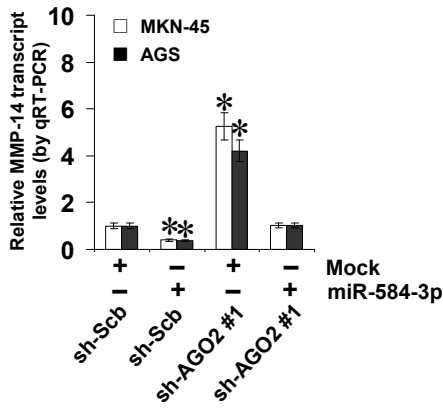

**d**

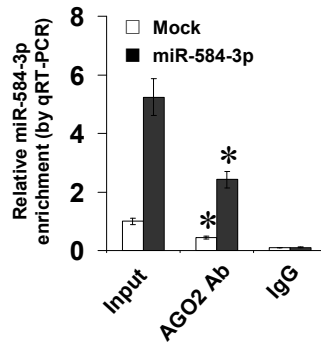

**e**

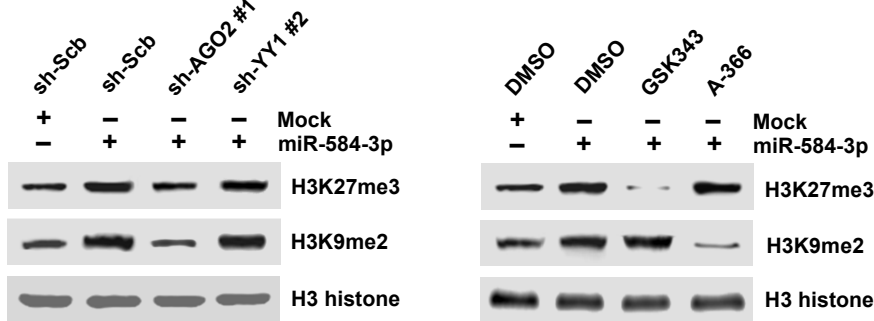

**f**

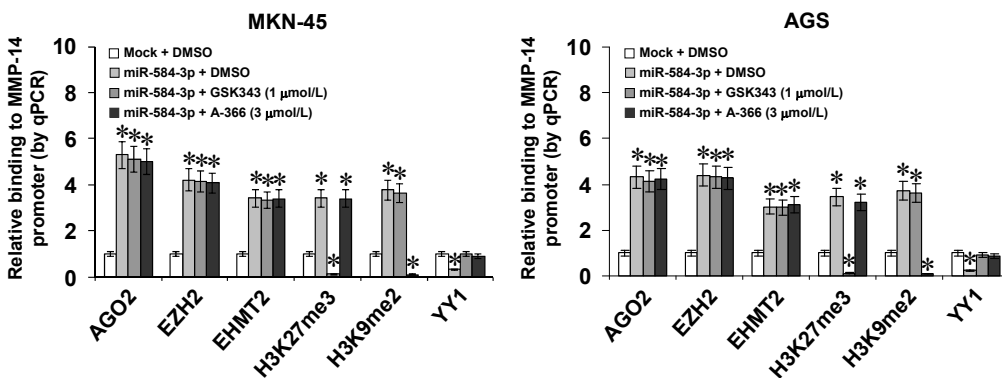

# Supplementary Figure S3

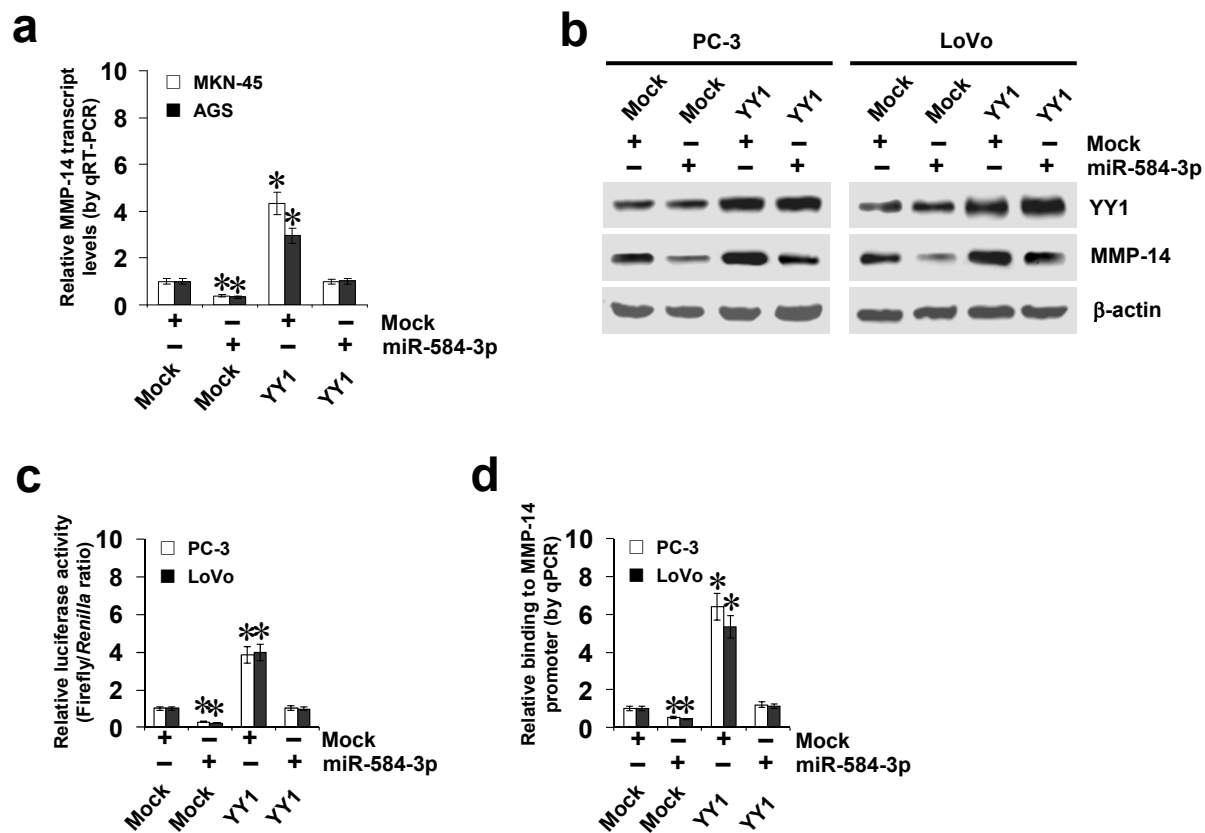

# Supplementary Figure S4

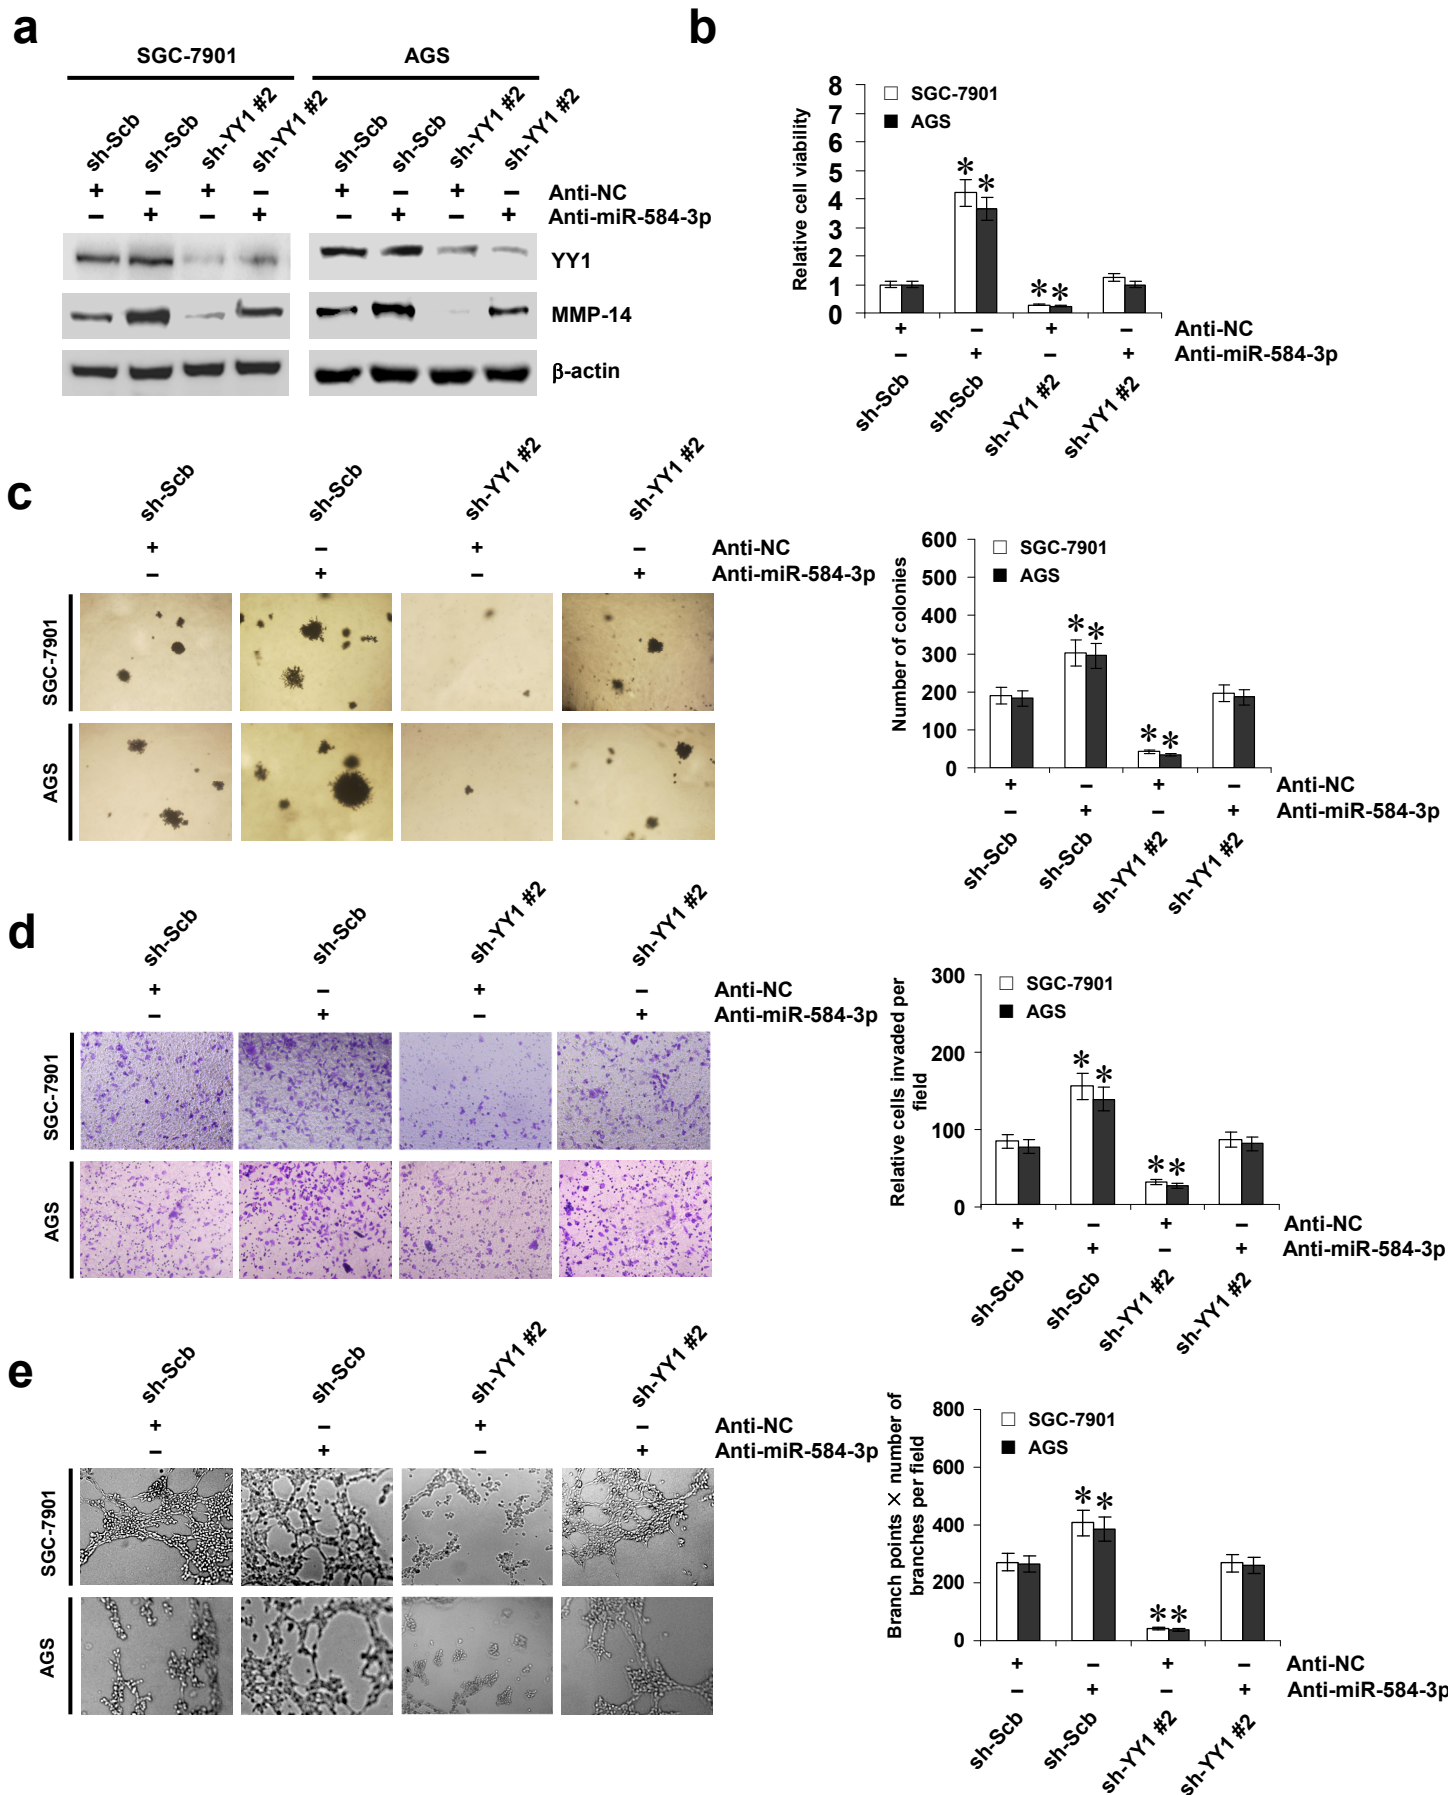

# Supplementary Figure S5

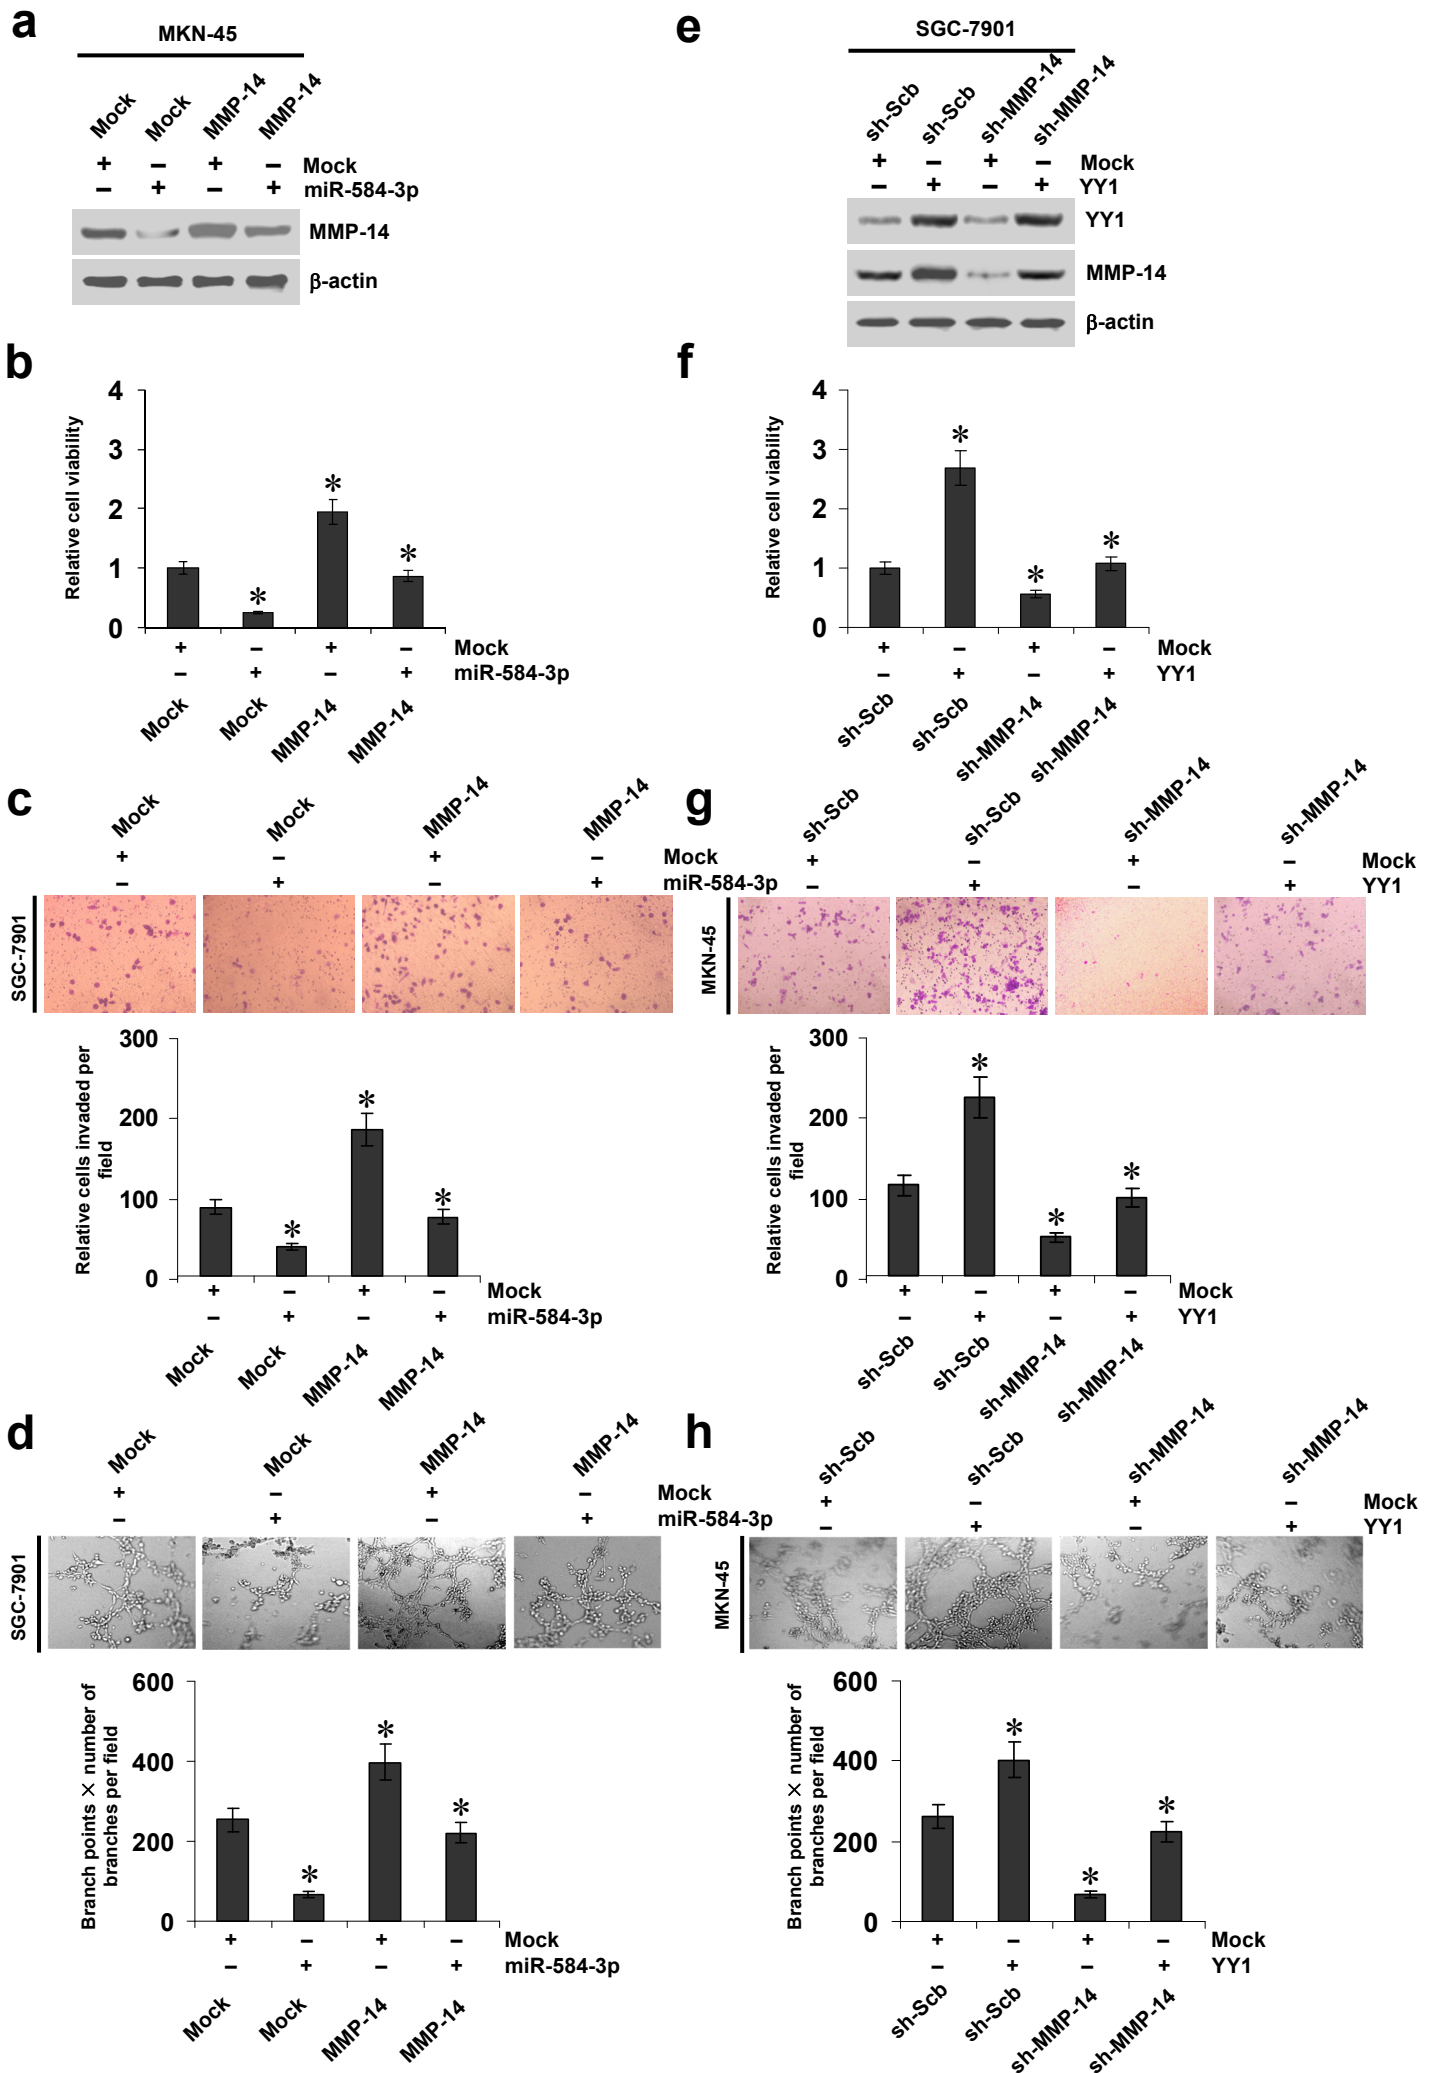



# Supplementary Figure S6

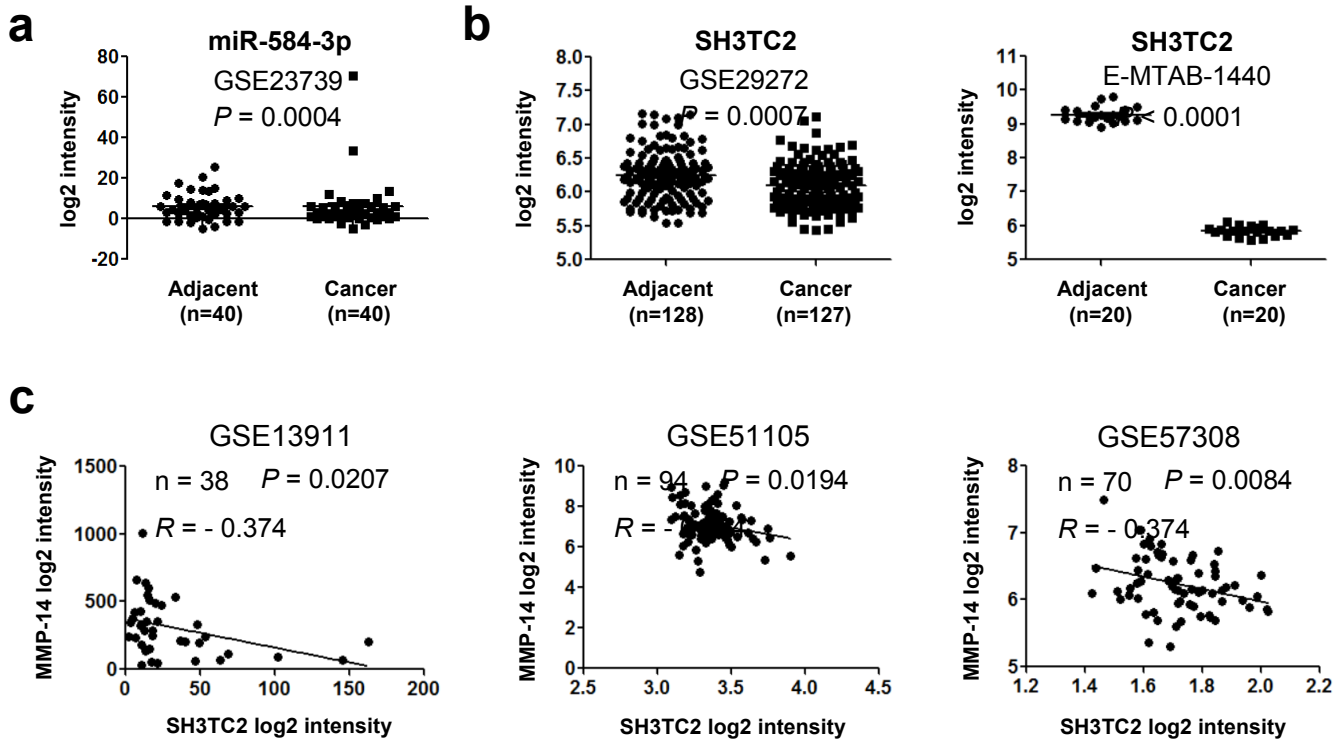

# Supplementary Figure S7

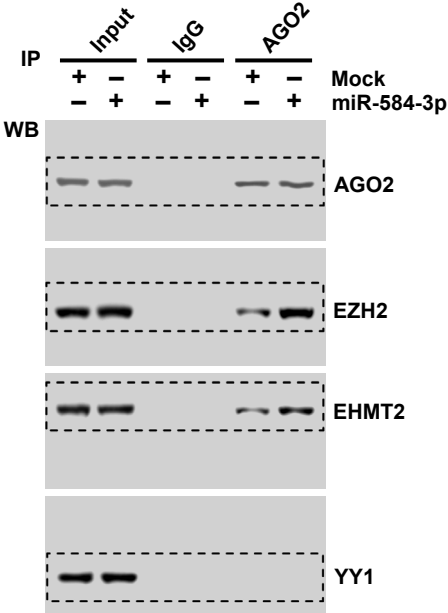

Supplementary Table S1 YY1 and MMP-14 expression in human gastric cancer tissues

| Clinicopathologic factor     | Total     | YY1 expression |         | MMP-14 expression |         |
|------------------------------|-----------|----------------|---------|-------------------|---------|
|                              | n (%)     | n (%)          | P-value | n (%)             | P-value |
| <b>Age (years)</b>           |           |                |         |                   |         |
| ≤60                          | 31 (51.7) | 19 (61.3)      | 0.833   | 22 (70.9)         | 0.866   |
| >60                          | 29 (48.3) | 17 (58.6)      |         | 20 (68.9)         |         |
| <b>Sex</b>                   |           |                |         |                   |         |
| Male                         | 42 (70.0) | 25 (59.5)      | 0.908   | 29 (69.0)         | 0.806   |
| Female                       | 18 (30.0) | 11 (61.1)      |         | 13 (72.2)         |         |
| <b>Size (diameter)</b>       |           |                |         |                   |         |
| ≤6 cm                        | 40 (66.7) | 24 (60.0)      | 1.000   | 28 (70.0)         | 1.000   |
| >6 cm                        | 20 (33.3) | 12 (60.0)      |         | 14 (70.0)         |         |
| <b>Laurén classification</b> |           |                |         |                   |         |
| Intestinal type              | 35 (58.3) | 20 (57.1)      | 0.593   | 24 (68.6)         | 0.775   |
| Diffuse type                 | 25 (41.7) | 16 (64.0)      |         | 18 (72.0)         |         |
| <b>Gastric wall invasion</b> |           |                |         |                   |         |
| T1/T2                        | 22 (36.7) | 3 (13.6)       | <0.001  | 8 (36.4)          | <0.001  |
| T3/T4                        | 38 (63.3) | 33 (86.8)      |         | 34 (89.5)         |         |
| <b>Lymph node metastasis</b> |           |                |         |                   |         |
| Negative                     | 21 (35.0) | 5 (23.8)       | <0.001  | 6 (28.6)          | <0.001  |
| Positive                     | 39 (65.0) | 31 (79.5)      |         | 36 (92.3)         |         |
| <b>Distant metastasis</b>    |           |                |         |                   |         |
| Negative                     | 46 (76.7) | 24 (52.2)      | 0.025   | 28 (60.9)         | 0.005   |
| Positive                     | 14 (23.3) | 12 (85.7)      |         | 14 (100.0)        |         |
| <b>TNM stage</b>             |           |                |         |                   |         |
| I/II                         | 20 (33.3) | 5 (25.0)       | <0.001  | 6 (30.0)          | <0.001  |
| III/IV                       | 40 (66.7) | 31 (77.5)      |         | 36 (90.0)         |         |

YY1, Yin Yang 1; MMP-14, matrix metalloproteinases 14; TNM, tumor-node-metastasis.

**Supplementary Table S2 Correlation among the expression of YY1 and MMP-14**

|                          | YY1 expression |      | <i>R</i> -value | <i>P</i> -value |
|--------------------------|----------------|------|-----------------|-----------------|
|                          | Low            | High |                 |                 |
| <b>MMP-14 expression</b> |                |      |                 |                 |
| Low                      | 28             | 2    | 0.802           | <0.001          |
| High                     | 4              | 26   |                 |                 |

YY1, Yin Yang 1; MMP-14, matrix metalloproteinases 14; Pearson's correlation coefficient was applied to determine the expression correlation.

**Supplementary Table S3 Univariate and multivariate analysis of prognostic factors in gastric cancer patients**

| Clinicopathologic factor     | n  | Univariate analysis        |                 | Multivariate analysis |             |                 |
|------------------------------|----|----------------------------|-----------------|-----------------------|-------------|-----------------|
|                              |    | Mean $\pm$ SEM<br>(months) | <i>P</i> -value | Hazard ratio          | 95% CI      | <i>P</i> -value |
| <b>Age (years)</b>           |    |                            |                 |                       |             |                 |
| ≤60                          | 31 | 33.2 $\pm$ 5.2             | 0.865           | 1.121                 | 0.421-3.012 | 0.712           |
| >60                          | 29 | 35.1 $\pm$ 4.3             |                 |                       |             |                 |
| <b>Sex</b>                   |    |                            |                 |                       |             |                 |
| Male                         | 42 | 34.4 $\pm$ 4.5             | 0.826           | 1.285                 | 0.412-3.223 | 0.716           |
| Female                       | 18 | 33.5 $\pm$ 5.3             |                 |                       |             |                 |
| <b>Size (diameter)</b>       |    |                            |                 |                       |             |                 |
| ≤6 cm                        | 40 | 34.1 $\pm$ 4.6             | 0.804           | 1.657                 | 1.242-5.021 | 0.424           |
| >6 cm                        | 20 | 33.5 $\pm$ 6.2             |                 |                       |             |                 |
| <b>Laurén classification</b> |    |                            |                 |                       |             |                 |
| Intestinal type              | 35 | 39.3 $\pm$ 4.1             | 0.142           | 1.612                 | 0.376-4.021 | 0.514           |
| Diffuse type                 | 25 | 30.1 $\pm$ 5.2             |                 |                       |             |                 |
| <b>Gastric wall invasion</b> |    |                            |                 |                       |             |                 |
| T1/T2                        | 22 | 61.5 $\pm$ 0.6             | <0.001          | 2.134                 | 1.455-6.252 | 0.446           |
| T3/T4                        | 38 | 19.5 $\pm$ 2.4             |                 |                       |             |                 |
| <b>Lymph node metastasis</b> |    |                            |                 |                       |             |                 |
| Negative                     | 21 | 60.2 $\pm$ 0.8             | <0.001          | 2.018                 | 1.212-5.323 | 0.523           |
| Positive                     | 39 | 21.5 $\pm$ 2.2             |                 |                       |             |                 |
| <b>Distant metastasis</b>    |    |                            |                 |                       |             |                 |
| Negative                     | 46 | 42.9 $\pm$ 3.2             | <0.001          | 2.126                 | 1.854-5.421 | 0.003           |
| Positive                     | 14 | 9.8 $\pm$ 0.7              |                 |                       |             |                 |
| <b>TNM stage</b>             |    |                            |                 |                       |             |                 |
| I/II                         | 20 | 62.1 $\pm$ 0.9             | <0.001          | 2.352                 | 1.698-6.124 | 0.001           |
| III/IV                       | 40 | 21.4 $\pm$ 2.7             |                 |                       |             |                 |
| <b>miR-584-3p expression</b> |    |                            |                 |                       |             |                 |
| Low                          | 31 | 18.5 $\pm$ 2.7             | <0.001          | 0.312                 | 0.131-0.765 | 0.018           |
| High                         | 29 | 55.7 $\pm$ 2.5             |                 |                       |             |                 |
| <b>YY1 expression</b>        |    |                            |                 |                       |             |                 |
| Low                          | 32 | 54.5 $\pm$ 3.1             | <0.001          | 2.743                 | 1.215-5.236 | 0.011           |
| High                         | 28 | 18.1 $\pm$ 2.3             |                 |                       |             |                 |

YY1, Yin Yang 1; TNM, tumor-node-metastasis. Log-rank test and Cox regression model were applied for univariate and multivariate analysis. *n*, number of patients; SEM, standard error of the mean; 95% CI, 95% confidence interval.

**Supplementary Table S4 Oligonucleotide sets used for constructs, inhibitors and short hairpin RNAs**

| <b>Oligo Set</b>                | <b>Sequences</b>                                                                                                                                                                      |
|---------------------------------|---------------------------------------------------------------------------------------------------------------------------------------------------------------------------------------|
| Pre-miR-584-3p                  | 5'-TGCTGTTATGGTTTGCCTGGGACTGAGGTTTTGGCCACTGACTGACCTCAGTCCCAG<br>GCAAACCATAA-3' (sense);<br>5'-CCTGTTATGGTTTGCCTGGGACTGAGGTCAGTCAGTGGCCAAAACCTCAGTCCCAGG<br>CAAACCATAAC-3' (antisense) |
| Pre-miR-NC                      | 5'-TGCTGAAATGTACTGCGCGTGGAGACGTTTTGGCCACTGACTGACGTCTCCACGCAG<br>TACATTT-3' (sense);<br>5'-CCTGAAATGTACTGCGTGGAGACGTCAGTCAGTGGCCAAAACGTCTCCACGCGCAGT<br>ACATTT-3' (antisense)          |
| pGL3-MMP14 mut<br>(ΔYY1)        | 5'-CAACCCCTGCGTGCAATAGCCTGCACCACAAAAGGCAAC TTAGAGGT-3' (sense);<br>5'-TGGTGCAGGCTATTGCACGCAGGGTTGAGGCCGCGATGGACAGCAGG-3' (antisense)                                                  |
| pGL3-MMP14 mut<br>(ΔmiR-584-3p) | 5'-CATCCCGTCCAAGTTAGCCAACACTACGGCCCCCTGCTGTCCATCGCGGCCTCAACCCC-3'<br>(sense);<br>5'-CAGCAGGGGGCCGTAGTTGGCTAACTTGGACGGGATGTGGGAGACTTTGTCCCTATA-3'<br>(antisense)                       |
| Anti-NC                         | RiboBio                                                                                                                                                                               |
| Anti-miR-584-3p                 | RiboBio                                                                                                                                                                               |
| sh-Scb                          | 5'-CCGGGCGAACGATCGAGTAAACGGACTCGAGTCCGTTTACTCGATCGTTTCGCTTTTT-3'<br>(sense);<br>5'-AATTCAAAAAGCGAACGATCGAGTAAACGGACTCGAGTCCGTTTACTCGATCGTTTCGC-3'<br>(antisense)                      |
| sh-YY1 #1                       | 5'-CCGGCGATGGTTGTAATAAGAAGTTCTCGAGAACTTCTTATTACAACCATCGTTTTTG-3'<br>(sense);<br>5'-AATTCAAAAACGATGGTTGTAATAAGAAGTTCTCGAGAACTTCTTATTACAACCATCG-3'<br>(antisense)                       |
| sh-YY1 #2                       | 5'-CCGGCCCAAACAACACTGGCAGAATTTCTCGAGAAATTCTGCCAGTTGTTTGGGTTTTTG-3'<br>(sense);<br>5'-AATTCAAAAACCCAAACAACACTGGCAGAATTTCTCGAGAAATTCTGCCAGTTGTTTGGG-3'<br>(antisense)                   |
| sh-p65 #1                       | 5'-CCGGGCCTTAATAGTAGGGTAAGTTCTCGAGAACTTACCCTACTATTAAGGCTTTTTG-3'<br>(sense);<br>5'-AATTCAAAAAGCCTTAATAGTAGGGTAAGTTCTCGAGAACTTACCCTACTATTAAGGC-3'<br>(antisense)                       |
| sh-p65 #2                       | 5'-CCGGCGGATTGAGGAGAAACGTAAACTCGAGTTTACGTTTCTCCTCAATCCGTTTTTG-3'<br>(sense);<br>5'-AATTCAAAAACGGATTGAGGAGAAACGTAAACTCGAGTTTACGTTTCTCCTCAATCCG-3'<br>(antisense)                       |
| sh-AGO2 #1                      | 5'-CCGGGCACAGCCAGTAATCGAGTTTCTCGAGAAACTCGATTACTGGCTGTGCTTTTTG-3'<br>(sense);<br>5'-AATTCAAAAAGCACAGCCAGTAATCGAGTTTCTCGAGAAACTCGATTACTGGCTGTGC-3'<br>(antisense)                       |
| sh-AGO2 #2                      | 5'-CCGGCGTCCGTGAATTTGGAATCATCTCGAGATGATTCAAATTCACGGACGTTTTTG-3'<br>(sense);<br>5'-AATTCAAAAACGTCCGTGAATTTGGAATCATCTCGAGATGATTCAAATTCACGGACG-3'<br>(antisense)                         |
| sh-MMP-14                       | 5'-CCGGCGCCAGAAGCTGAAGGTAGAACTCGAGTTCTACCTTCAGCTTCTGGCGTTTTTG-3'<br>(sense);<br>5'-AATTCAAAAACGCCAGAAGCTGAAGGTAGAACTCGAGTTCTACCTTCAGCTTCTGGCG-3'<br>(antisense)                       |

Pre-miR-NC, negative control pre-miRNA; MMP-14, matrix metalloproteinases 14; Anti-NC, negative control inhibitor; sh-Scb, scramble short hairpin RNA; YY1, Yin Yang 1; AGO1, argonaute 1; AGO2, argonaute 2.

**Supplementary Table S5 Primer sets used for qRT-PCR, nuclear run-on, RIP and ChIP**

| <b>Primer set</b>           | <b>Primers</b> | <b>Sequence</b>             | <b>Product size (bp)</b> | <b>Application</b>        |
|-----------------------------|----------------|-----------------------------|--------------------------|---------------------------|
| MMP-14                      | Forward        | 5'-GCCTTCTGTTTCCTGATAA-3'   | 225                      | qRT-PCR<br>nuclear run-on |
|                             | Reverse        | 5'-CCATCCTTCCTCTCGTAG-3'    |                          |                           |
| VEGF                        | Forward        | 5'-ATGACGAGGGCCTGGAGTGT-3'  | 226                      | qRT-PCR                   |
|                             | Reverse        | 5'-CATTTACACGTCTGCCGATCT-3' |                          |                           |
| YY1                         | Forward        | 5'-GTGCAGAATGTGGCAAAGC-3'   | 168                      | qRT-PCR                   |
|                             | Reverse        | 5'-AGGGCCTGTCTCCGGTATG-3'   |                          |                           |
| β-actin                     | Forward        | 5'-ATCTACGAGGGGTATGCC-3'    | 227                      | qRT-PCR                   |
|                             | Reverse        | 5'-TAGCTCTTCTCCAGGGAG-3'    |                          |                           |
| miR-584-3p                  | Forward        | RiboBio                     |                          | qRT-PCR, RIP              |
|                             | Reverse        | RiboBio                     |                          |                           |
| U6                          | Forward        | RiboBio                     |                          | qRT-PCR                   |
|                             | Reverse        | RiboBio                     |                          |                           |
| MMP-14 set 1<br>(-326/-130) | Forward        | 5'-TCAAGCCACTCAGAATATGC-3'  | 197                      | ChIP                      |
|                             | Reverse        | 5'-GGTTGTTTTAGCCTGAATCC-3'  |                          |                           |
| MMP-14 set 2<br>(-122/+69)  | Forward        | 5'-CAACCAGGAAAGGAGGGC-3'    | 191                      | ChIP                      |
|                             | Reverse        | 5'-TCGGCTTGGAGTTAAAGG-3'    |                          |                           |

MMP-14, matrix metalloproteinases 14; VEGF, vascular endothelial growth factor; YY1, Yin Yang 1.
